# Supplementary material for: Independent Component Analysis and Decision Trees for ECG Holter Recording De-Noising
Source: PLOS journal article supplement (doi:10.1371/journal.pone.0098450), 2014-06-06
Supplement: S1 (10.1371/journal.pone.0098450.s001) [file journal.pone.0098450.s001]

## Appendix 1 (S1): JADE algorithm

Joint Approximate Diagonalization of Eigen matrices algorithm (*JADE*) is blind source separation method based on diagonalization of fourth-order cumulant tensor (we call it cumulant tensor for simplicity). Cumulant tensor is a four-dimensional array whose entries are given by fourth-order cross cumulants of data:

$$cum(x_i, x_j, x_k, x_l) = E\{x_i x_j x_k x_l\} - E\{x_i x_j\}E\{x_k x_l\} - E\{x_i x_k\}E\{x_j x_l\} - E\{x_i x_l\}E\{x_j x_k\}, \quad (1)$$

where  $x_i$  represents measured mixture of source signals,  $i, j, k, l = 1 \dots n$ , where  $n$  is number of measured mixtures and  $E\{\}$  is expectation of data. Desirable property of cumulants is that all cumulants of linear combinations can be obtained as linear combinations of data cumulants [1]. Thus cumulants contain all fourth-order information of the data.

The cumulant tensor is a linear operator defined by the fourth-order cumulants defining linear transformation in the space of  $n \times n$  matrices. We can define linear transformation on linear space of dimension  $n \times n$ . The  $i, j$ th element of matrix given by transformation  $\mathbf{F}_{ij}$  is defined as:

$$\mathbf{F}_{ij}(\mathbf{M}) = \sum_{kl} m_{kl} cum(x_i, x_j, x_k, x_l), \quad (2)$$

where  $m_{kl}$  are the elements of transformed matrix  $\mathbf{M}$ .

Cumulant tensor as any symmetric operator has an eigenvalue decomposition. An eigenmatrix of the tensor is a matrix such that:

$$\mathbf{F}(\mathbf{M}) = \lambda \mathbf{M}, \quad (3)$$

where  $\lambda$  is a scalar eigenvalue.

Considering whitened data:  $\mathbf{z} = \mathbf{V}\mathbf{x} = \mathbf{V}\mathbf{A}\mathbf{s} = \mathbf{W}^T\mathbf{s}$ , where  $\mathbf{z}$  is whitened data,  $\mathbf{V}$  is whitening matrix,  $\mathbf{x}$  are mixed signals,  $\mathbf{A}$  is mixing matrix and  $\mathbf{s}$  are desired source signals, the cumulant tensor of  $\mathbf{z}$  has special structure that can be seen in the eigenvalue decomposition. Every matrix of the form:

$$\mathbf{M} = \mathbf{w}_m \mathbf{w}_m^T, \quad (4)$$

for  $m = 1, \dots, n$  is an eigenmatrix. The vector  $\mathbf{w}_m$  is one of the rows of matrix  $\mathbf{W}$ . It can be shown that:

$$\mathbf{F}_{ij}(\mathbf{w}_m \mathbf{w}_m^T) = w_{mi} w_{mj} kurt(s_m), \quad (5)$$

where  $kurt(s_m)$  is kurtosis of corresponding source signal  $s_m$ . This is because all elements of cumulant tensor, whose indices are different equal zero due to independence of source signals [1]. We can observe that if we knew eigenmatrices we could easily obtain independent components.

All above can be rephrased as follows: The matrix  $\mathbf{W}$  diagonalizes  $\mathbf{F}(\mathbf{M})$  for any  $\mathbf{M}$ . This means that  $\mathbf{W}\mathbf{F}(\mathbf{M})\mathbf{W}^T$  is diagonal. This is because matrix  $\mathbf{F}$  is diagonal for linear combination of terms of form  $\mathbf{w}_i \mathbf{w}_i^T$  assuming that ICA model holds. Thus we can take set of different matrices  $\mathbf{M}_i, i = 1, \dots, k$  and try to make  $\mathbf{W}\mathbf{F}(\mathbf{M})_i \mathbf{W}^T$  as diagonal as possible. In real situation the model does not hold exactly and errors in data make the exact diagonalization impossible.

During diagonalization one needs to measure diagonality of matrix  $\mathbf{W}\mathbf{F}(\mathbf{M})_i \mathbf{W}^T$ , this can be measured i.e. using the following measure [1]:

$$J_{JADE}(\mathbf{W}) = \sum_i \|\text{diag}(\mathbf{W}\mathbf{F}(\mathbf{M})_i \mathbf{W}^T)\|^2, \quad (6)$$

where  $\|\text{diag}(\cdot)\|^2$  means sum of squares of the diagonal.

The crucial is selection of set of matrices  $\mathbf{M}_i$ . One possible and natural choice is to take the eigenmatrices of the cumulant tensor, which is exactly what JADE algorithm does [1].

## References

1. Hyvärinen A, Karhunen J, Oja E (2001) Independent Component Analysis. Wiley.
